# Supplementary material for: Determination of acid structures on the surface of sulfated monoclinic and tetragonal zirconia through experimental and theoretical approaches
Source: Royal Society of Chemistry journal article supplement (doi:10.1039/d1cy01860d), 2021-11-18
Supplement: d1cy01860d1.pdf [file d1cy01860d1.pdf]

## Electronic supplementary information (ESI)

### Determination of Acid Structures on the Surface of Sulfated Monoclinic and Tetragonal Zirconia through Experimental and Theoretical Approaches

Daofeng Huang,<sup>a</sup> Siyue Chen,<sup>b</sup> Sicong Ma,<sup>c</sup> Xin Chen,<sup>a</sup> Yuanhang Ren,<sup>a</sup> Meiyin Wang,<sup>a</sup> Lin Ye,<sup>a</sup> Li Zhang,<sup>a</sup> Xueying Chen,<sup>a</sup> Zhi-Pan Liu,<sup>b</sup> Bin Yue<sup>\*a</sup> and Heyong He<sup>\*a</sup>

<sup>a</sup> Department of Chemistry and Shanghai Key Laboratory of Molecular Catalysis and Innovative Materials, Fudan University, Shanghai 200438, P. R. China.

<sup>b</sup> Collaborative Innovation Center of Chemistry for Energy Material, Shanghai Key Laboratory of Molecular Catalysis and Innovative Materials, Key Laboratory of Computational Physical Science, Department of Chemistry, Fudan University, Shanghai 200438, China.

<sup>c</sup> Key Laboratory of Synthetic and Self-Assembly Chemistry for Organic Functional Molecules, Shanghai Institute of Organic Chemistry, Chinese Academy of Sciences, Shanghai 200032, China.

\* Corresponding authors at: heyonghe@fudan.edu.cn (Heyong He); yuebin@fudan.edu.cn (Bin Yue)

**Table S1.** The acid models on SZ.

| Proposed models                                                                   | References             | Proposed models                                                                    | References                |
|-----------------------------------------------------------------------------------|------------------------|------------------------------------------------------------------------------------|---------------------------|
| 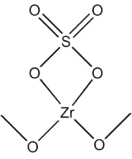 | Yamaguchi <sup>1</sup> |  | Ward <sup>2</sup>         |
|  | Arata <sup>3</sup>     |  | Clearfield <sup>4,5</sup> |
|  | Lavalley <sup>6</sup>  |  | Riemer <sup>7</sup>       |
|  | Morterra <sup>8</sup>  |  | Kustov <sup>9</sup>       |

**Table S2.** The  $\Delta E_{\text{NH}_3}$  on different structures.

| Samples    | $\Delta E_{\text{NH}_3}$ (kJ·mol <sup>-1</sup> ) |       | Origin    |
|------------|--------------------------------------------------|-------|-----------|
|            | Zr-(OH)-Zr                                       | Zr-OH |           |
| S-M(111)   | -97, -74                                         |       | Figure 3a |
| S-M(-111)  | -117, -88                                        |       | Figure 3b |
| S-M(001)   | -73, -66, -66                                    |       | Figure 3c |
| S-M(011)   | -67                                              |       | Figure 3d |
| S-T(101)   | -79, -65                                         |       | Figure 4a |
| S-T(001)   | -71, -55                                         |       | Figure 4b |
| S-T(100)   | -76, -65                                         |       | Figure 4c |
| S-T(111)-1 | -61                                              | -58   | Figure 4d |
| S-T(111)-2 | -76                                              |       | Figure 4e |
| 2S-T(111)  | — <sup>a</sup>                                   |       | Figure 4f |

<sup>a</sup> The  $\Delta E_{\text{NH}_3}$  on the hydroxyl groups on 2S-T(111) is out of detection because of the nearby highly acidic protons on Zr-(OH)-SO<sub>2</sub>.

**Table S3.** The unit parameters of the structures on different planes.

| Structural models | a (Å) | b (Å) | Angle (degree) | Unit area per H <sub>2</sub> SO <sub>4</sub> (Å <sup>2</sup> /H <sub>2</sub> SO <sub>4</sub> ) |
|-------------------|-------|-------|----------------|------------------------------------------------------------------------------------------------|
| S-M(111)          | 7.39  | 7.51  | 114.6          | 50.5                                                                                           |
| S-M(-111)         | 6.80  | 7.39  | 63.73          | 45.1                                                                                           |
| S-M(001)          | 10.37 | 10.53 | 90             | 109.2                                                                                          |
| S-M(011)          | 10.37 | 7.51  | 83.12          | 77.3                                                                                           |
| S-T(101)          | 6.37  | 7.26  | 90             | 46.2                                                                                           |
| S-T(001)          | 7.25  | 7.25  | 90             | 52.6                                                                                           |
| S-T(100)          | 10.48 | 7.26  | 90             | 76.1                                                                                           |
| S-T(111)-1        | 10.26 | 6.37  | 66.28          | 59.8                                                                                           |
| S-T(111)-2        | 10.26 | 6.37  | 66.28          | 59.8                                                                                           |
| 2S-T(111)         | 10.26 | 6.37  | 66.28          | 29.9                                                                                           |

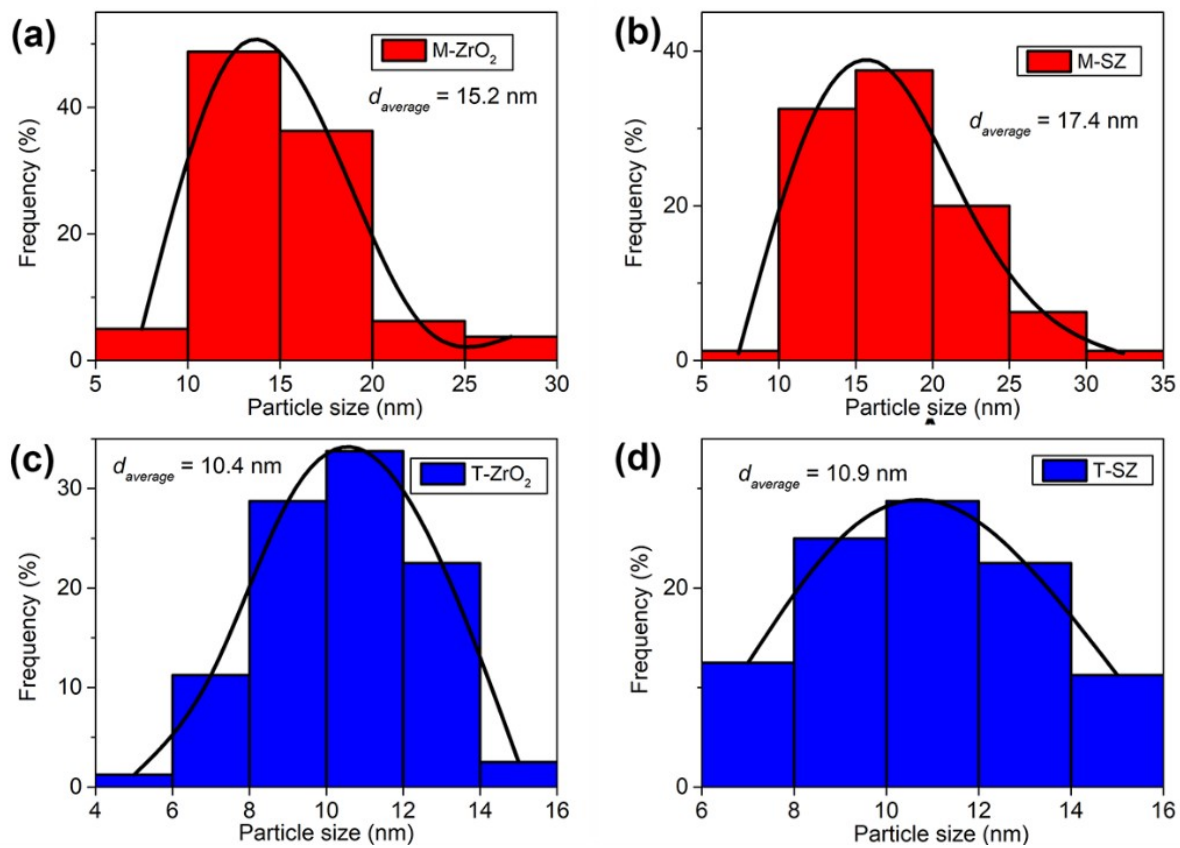

**Figure S1.** The particle size distributions of (a) M-ZrO<sub>2</sub>, (b) M-SZ, (c) T-ZrO<sub>2</sub> and (d) T-SZ.

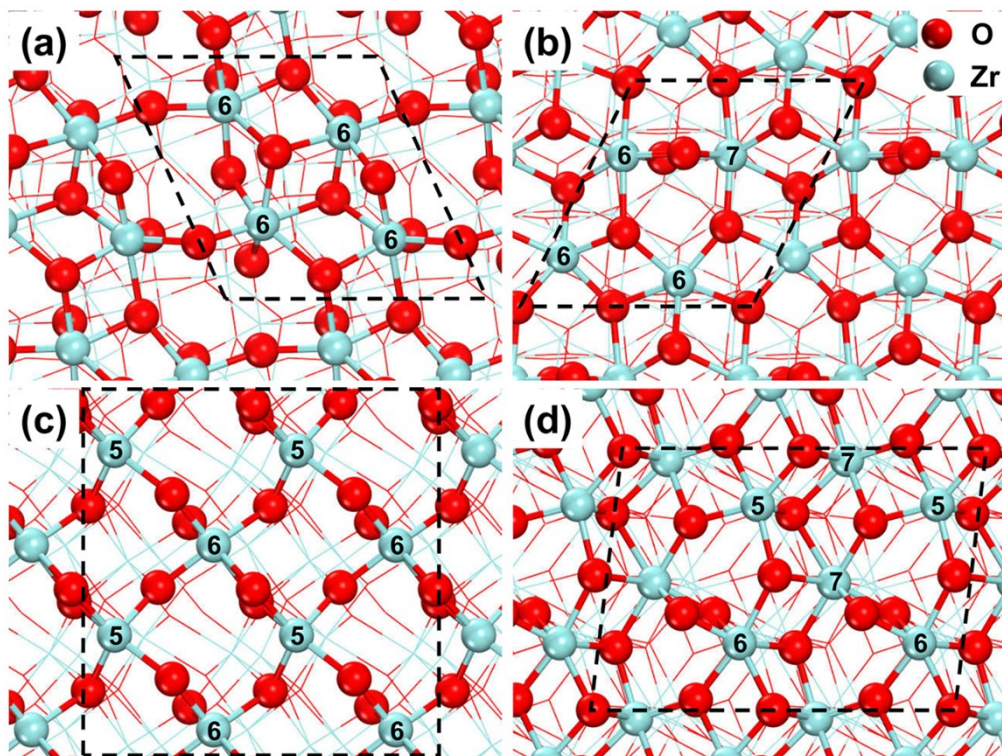

**Figure S2.** The clean planes of monoclinic zirconia. (a)  $M(111)$ , (b)  $M(-111)$ , (c)  $M(001)$  and (d)  $M(011)$ . The numbers on zirconium cations represent their coordination number. The area within the dotted lines corresponds to the unit in Table S3.

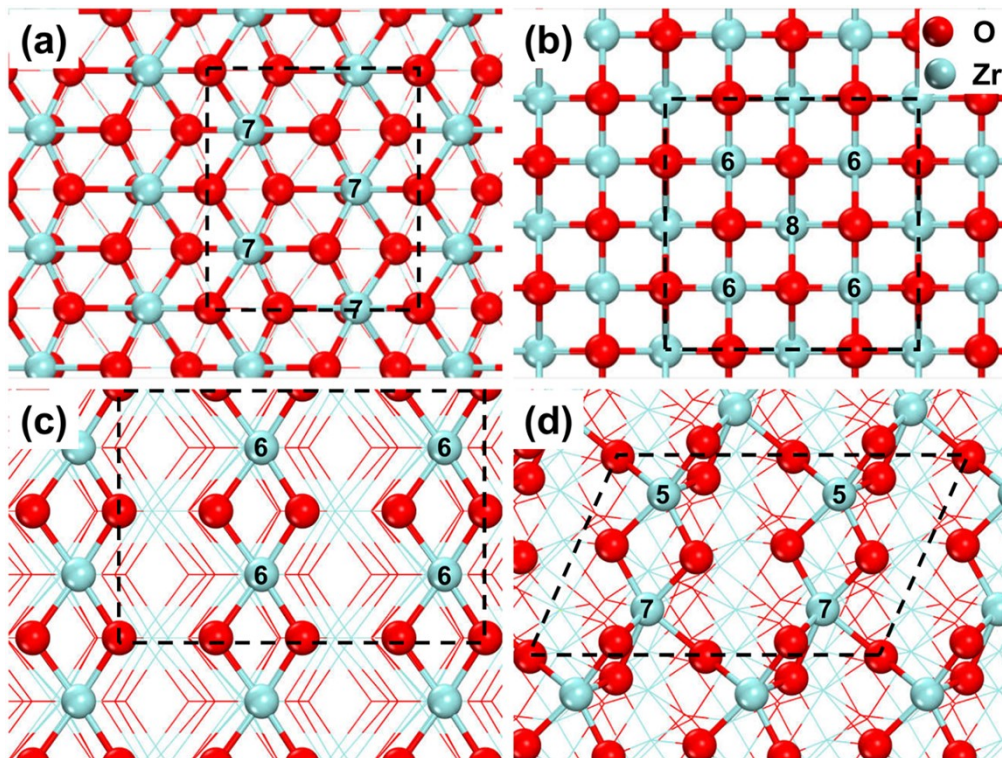

**Figure S3.** The clean planes of tetragonal zirconia. (a) T(101) (b) T(001), (c) T(100) and (d) T(111). The numbers on the zirconium cations represent their coordination number. The area within the dotted lines corresponds to the unit in Table S3.

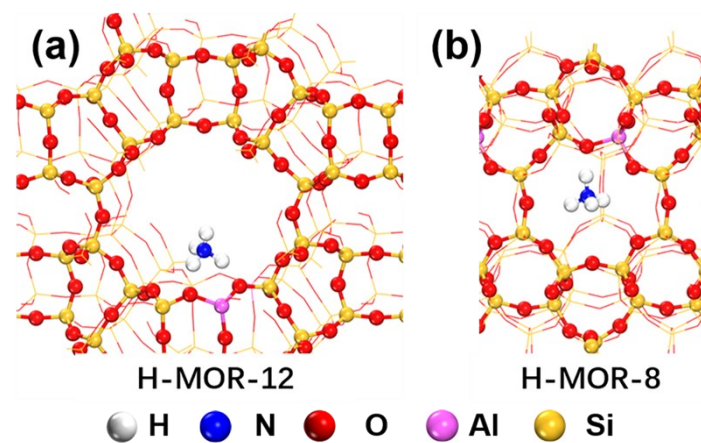

**Figure S4.** The structures of NH<sub>3</sub> adsorbed on (a) H-MOR-12 and (b) H-MOR-8.



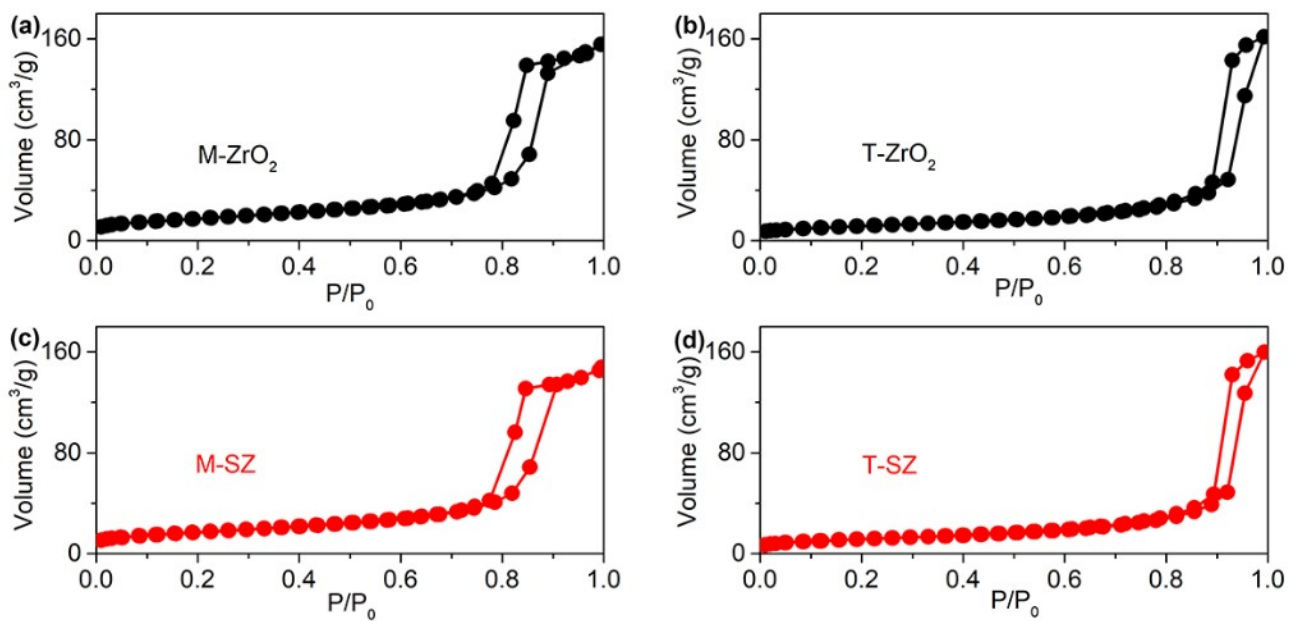

**Figure S5.**  $N_2$  adsorption-desorption isotherms of (a) M- $ZrO_2$ , (b) T- $ZrO_2$ , (c) M-SZ and (d) T-SZ.

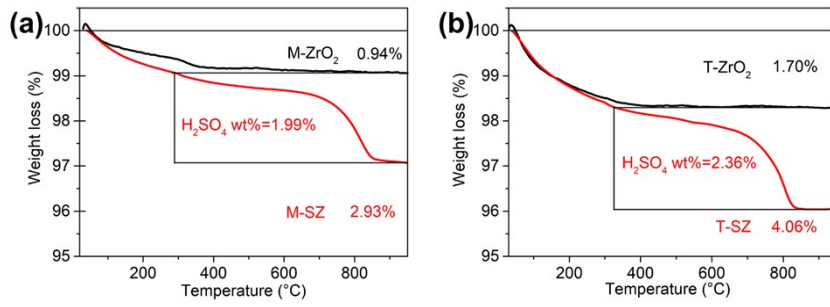

**Figure S6.** The TG curves of (a) M-ZrO<sub>2</sub> and M-SZ and (b) T-ZrO<sub>2</sub> and T-SZ.

The third step of the weight loss could be corresponded to the chemical dissociation of SO<sub>3</sub> to SO<sub>2</sub> and O<sub>2</sub> species on zirconia.<sup>10</sup> The sulfur content in form of sulfuric acid may be calculated by

$$\text{H}_2\text{SO}_4 \text{ wt\%} = \text{SO}_3 \text{ wt\%} \times \frac{98}{80}$$

as 1.99 wt% for M-SZ and 2.36% for T-SZ.

### The calculation of the adsorbed sulfuric acid molecules on M-SZ and T-SZ. (Section 3.5.1)

$$S_{M/T(hkl)} = D(H_2SO_4) \times N_A \times U_{S-M/T(hkl)} \quad (1)$$

According to the equation (1), for M-SZ, if the strong BA only relates to S-M(001)

$$S_{M(001)} = D(H_2SO_4) \times N_A \times U_{S-M(001)} = 23.9 \mu\text{mol}\cdot\text{g}^{-1} \times 6.022 \times 10^{23} \text{ mol}^{-1} \times 109.2 \text{ \AA}^2 = 15.7 \text{ m}^2\cdot\text{g}^{-1}.$$

If the strong BA only relates to S-M(011),

$$S_{M(011)} = D(H_2SO_4) \times N_A \times U_{S-M(011)} = 23.9 \mu\text{mol}\cdot\text{g}^{-1} \times 6.022 \times 10^{23} \text{ mol}^{-1} \times 77.3 \text{ \AA}^2 = 11.1 \text{ m}^2\cdot\text{g}^{-1}.$$

So, the total specific surface area of M(001) and M(011) is in the range of 11.1 ~ 15.7 m<sup>2</sup>·g<sup>-1</sup> and the specific surface area of the rest crystal planes is 44.5 ~ 49.1 m<sup>2</sup>·g<sup>-1</sup>.

If M(111) represents the rest planes, the sulfuric acid density on M(111) is calculated as

$$\begin{aligned} D(H_2SO_4) &= S_{M(111)} / (N_A \times U_{S-M(111)}) = (44.5 \sim 49.1) \text{ m}^2\cdot\text{g}^{-1} / (6.022 \times 10^{23} \text{ mol}^{-1} \times 50.5 \text{ \AA}^2) \\ &= 146 \sim 161 \mu\text{mol}\cdot\text{g}^{-1}. \end{aligned}$$

If M(-111) represents the rest planes, the sulfuric acid density on M(-111) is calculated as

$$\begin{aligned} D(H_2SO_4) &= S_{M(-111)} / (N_A \times U_{S-M(-111)}) = (44.5 \sim 49.1) \text{ m}^2\cdot\text{g}^{-1} / (6.022 \times 10^{23} \text{ mol}^{-1} \times 45.1 \text{ \AA}^2) \\ &= 164 \sim 181 \mu\text{mol}\cdot\text{g}^{-1}. \end{aligned}$$

As a result, the sulfuric acid density on M(111) and M(-111) is in the range of 146 ~ 181 μmol·g<sup>-1</sup>. The percentage of the sulfuric acid molecules related to these strong BA sites is 23.9 / (23.9 + 181) × 100% ~ 23.9 / (23.9 + 146) × 100% = 12 ~ 14%.

For T-SZ, the specific area for T(111) is calculated by equation (1) as

$$S_{T(111)} = D(H_2SO_4) \times N_A \times U_{S-T(111)-1,2} = 29.2 \mu\text{mol}\cdot\text{g}^{-1} \times 6.022 \times 10^{23} \text{ mol}^{-1} \times 59.8 \text{ \AA}^2 = 10.5 \text{ m}^2\cdot\text{g}^{-1}, \text{ and}$$

$$S_{T(111)} = D(H_2SO_4) \times N_A \times U_{2S-T(111)} = 29.2 \mu\text{mol}\cdot\text{g}^{-1} \times 6.022 \times 10^{23} \text{ mol}^{-1} \times 29.9 \text{ \AA}^2 = 5.3 \text{ m}^2\cdot\text{g}^{-1}.$$

So, the specific area of T(111) is in the range of 5.3 ~ 10.5 m<sup>2</sup>·g<sup>-1</sup> and the total area of the rest planes is 29.9 ~ 35.1 m<sup>2</sup>·g<sup>-1</sup>.

If T(101) represents the rest planes, the sulfuric acid density on T(101) is calculated as

$$\begin{aligned} D(H_2SO_4) &= S_{T(101)} / (N_A \times U_{S-T(101)}) = (29.9 \sim 35.1) \text{ m}^2\cdot\text{g}^{-1} / (6.022 \times 10^{23} \text{ mol}^{-1} \times 46.2 \text{ \AA}^2) \\ &= 107 \sim 126 \mu\text{mol}\cdot\text{g}^{-1} \end{aligned}$$

If T(001) represents the rest planes, the sulfuric acid density on T(001) is calculated as

$$\begin{aligned} D(H_2SO_4) &= S_{T(001)} / (N_A \times U_{S-T(001)}) = (29.9 \sim 35.1) \text{ m}^2\cdot\text{g}^{-1} / (6.022 \times 10^{23} \text{ mol}^{-1} \times 52.6 \text{ \AA}^2) \\ &= 94.4 \sim 111 \mu\text{mol}\cdot\text{g}^{-1} \end{aligned}$$

If T(100) represents the rest planes, the sulfuric acid density is calculated as

$$\begin{aligned} D(H_2SO_4) &= S_{T(100)} / (N_A \times U_{S-T(100)}) = (29.9 \sim 35.1) \text{ m}^2\cdot\text{g}^{-1} / (6.022 \times 10^{23} \text{ mol}^{-1} \times 76.1 \text{ \AA}^2) \\ &= 65.2 \sim 76.6 \mu\text{mol}\cdot\text{g}^{-1} \end{aligned}$$

So, the sulfuric acid density on the rest planes is in the range of 65.2 ~ 126 μmol·g<sup>-1</sup>. The percentage of the sulfuric acid molecules related to the strong BA is 29.2 / (29.2 + 126) × 100% ~ 29.2 / (29.2 + 65.2) × 100% = 19 ~ 31 %

### The density ratio of the newly generated LA to strong BA sites on T-SZ (3.5.2)

$$D(\text{LA}) = S_{0-T} \times \text{Area percentage} \times X / (N_A \times U_{S-T(\text{hkl})}) \quad (2)$$

According to the equation (2) in Section 3.5.2, for S-T(101),  $X = 0$ ,  $D(\text{LA}) = 0 \mu\text{mol}\cdot\text{g}^{-1}$ .

For S-T(001),

$$D(\text{LA}) = 40.4 \text{ m}^2\cdot\text{g}^{-1} \times 4\% \times 4 / (6.022 \times 10^{23} \text{ mol}^{-1} \times 52.6 \text{ \AA}^2) = 20.4 \mu\text{mol}\cdot\text{g}^{-1}$$

For S-T(100),

$$D(\text{LA}) = 40.4 \text{ m}^2\cdot\text{g}^{-1} \times 18\% \times 2 / (6.022 \times 10^{23} \text{ mol}^{-1} \times 76.1 \text{ \AA}^2) = 31.7 \mu\text{mol}\cdot\text{g}^{-1}$$

For structures on T(111), when S-T(111)-1 is the only structure on T(111),

$$D(\text{LA}) = 0 \mu\text{mol}\cdot\text{g}^{-1} \text{ and the total LA density on T-SZ } (D(\text{LA})_{\text{total}}) \text{ is } 20.4 + 31.7 = 52.1 \mu\text{mol}\cdot\text{g}^{-1}.$$

When S-T(111)-2 is the only structure on T(111),

$$D(\text{LA}) = 40.4 \text{ m}^2\cdot\text{g}^{-1} \times 17\% \times 2 / (6.022 \times 10^{23} \text{ mol}^{-1} \times 59.8 \text{ \AA}^2) = 38.1 \mu\text{mol}\cdot\text{g}^{-1} \text{ and } D(\text{LA})_{\text{total}} = 20.4 + 31.7 + 38.1 = 90.2 \mu\text{mol}\cdot\text{g}^{-1}.$$

When 2S-T(101) represents the structure on T(111),

$$D(\text{LA}) = 0 \mu\text{mol}\cdot\text{g}^{-1} \text{ and } D(\text{LA})_{\text{total}} = 20.4 + 31.7 + 0 = 52.1 \mu\text{mol}\cdot\text{g}^{-1}$$

$$D(\text{BA}) = S_{0-T} \times \text{area percentage} / (N_A \times U_{S-T(\text{hkl})}) \quad (3)$$

According to equation (3) in Section 3.5.2, only structures on T(111) generate strong BA.

When S-T(111)-1 is the only structure on T(111),

$$D(\text{BA}) = 40.4 \text{ m}^2\cdot\text{g}^{-1} \times 17\% / (6.022 \times 10^{23} \text{ mol}^{-1} \times 59.8 \text{ \AA}^2) = 19.1 \mu\text{mol}\cdot\text{g}^{-1} \text{ and } D(\text{LA})_{\text{total}} :$$

$$D(\text{BA}) = 52.1 \mu\text{mol}\cdot\text{g}^{-1} : 19.1 \mu\text{mol}\cdot\text{g}^{-1} = 2.7:1.0.$$

When S-T(111)-2 is the only structure on T(111),

$$D(\text{BA}) = 40.4 \text{ m}^2\cdot\text{g}^{-1} \times 17\% / (6.022 \times 10^{23} \text{ mol}^{-1} \times 59.8 \text{ \AA}^2) = 19.1 \mu\text{mol}\cdot\text{g}^{-1} \text{ and } D(\text{LA})_{\text{total}} : D(\text{BA}) = 90.2 \mu\text{mol}\cdot\text{g}^{-1} : 19.1 \mu\text{mol}\cdot\text{g}^{-1} = 4.7:1.0.$$

When 2S-T(101) represents the structure on T(111),

$$D(\text{BA}) = 40.4 \text{ m}^2\cdot\text{g}^{-1} \times 17\% / (6.022 \times 10^{23} \text{ mol}^{-1} \times 29.9 \text{ \AA}^2) = 38.1 \mu\text{mol}\cdot\text{g}^{-1} \text{ and } D(\text{LA})_{\text{total}} : D(\text{BA}) = 52.1 \mu\text{mol}\cdot\text{g}^{-1} : 38.1 \mu\text{mol}\cdot\text{g}^{-1} = 1.4:1.0.$$

So the density ratio of the newly generated LA to strong BA sites is in the range of ca.  $1.4:1.0 \sim 4.7:1.0$ .

The calculation detail of the optimized XYZ position for typical acid structures.

| Optimized XYZ position for S-M(001) |          |          |         |                  |          |         |          |
|-------------------------------------|----------|----------|---------|------------------|----------|---------|----------|
| Lengths<br>Å                        | a        | b        | c       | Angles<br>degree | $\alpha$ | $\beta$ | $\gamma$ |
|                                     | 10.3746  | 10.5298  | 20.3527 |                  | 90       | 90      | 90       |
| Atom                                | x        | y        | z       |                  |          |         |          |
| O                                   | 9.39879  | 1.02668  | 3.23194 |                  |          |         |          |
| O                                   | 4.21154  | 6.29152  | 3.23187 |                  |          |         |          |
| O                                   | 9.39912  | 6.29148  | 3.23207 |                  |          |         |          |
| O                                   | 1.33819  | 3.58505  | 3.6553  |                  |          |         |          |
| O                                   | 6.52507  | 3.58538  | 3.65535 |                  |          |         |          |
| O                                   | 1.3381   | 8.85002  | 3.65533 |                  |          |         |          |
| O                                   | 6.52516  | 8.85021  | 3.65537 |                  |          |         |          |
| Zr                                  | 2.98234  | 2.33424  | 4.1716  |                  |          |         |          |
| Zr                                  | 8.17007  | 2.33453  | 4.17143 |                  |          |         |          |
| Zr                                  | 2.98226  | 7.59939  | 4.17161 |                  |          |         |          |
| Zr                                  | 8.17025  | 7.59949  | 4.17136 |                  |          |         |          |
| Zr                                  | 0.1567   | 5.03383  | 4.45089 |                  |          |         |          |
| Zr                                  | 5.34452  | 5.03406  | 4.45094 |                  |          |         |          |
| Zr                                  | 0.15651  | 10.29883 | 4.45081 |                  |          |         |          |
| Zr                                  | 5.34445  | 10.29874 | 4.45096 |                  |          |         |          |
| O                                   | 1.73887  | 0.97484  | 4.8953  |                  |          |         |          |
| O                                   | 6.92553  | 0.97423  | 4.89541 |                  |          |         |          |
| O                                   | 1.73879  | 6.23957  | 4.89535 |                  |          |         |          |
| O                                   | 6.92543  | 6.23902  | 4.89543 |                  |          |         |          |
| O                                   | 3.72545  | 3.92097  | 5.39537 |                  |          |         |          |
| O                                   | 8.91268  | 3.92093  | 5.39541 |                  |          |         |          |
| O                                   | 3.72544  | 9.18587  | 5.39539 |                  |          |         |          |
| O                                   | 8.91267  | 9.18583  | 5.39543 |                  |          |         |          |
| O                                   | 4.12464  | 1.38091  | 5.83204 |                  |          |         |          |
| O                                   | 9.31196  | 1.38091  | 5.83218 |                  |          |         |          |
| O                                   | 4.12466  | 6.64578  | 5.83205 |                  |          |         |          |
| O                                   | 9.31196  | 6.64579  | 5.83221 |                  |          |         |          |
| O                                   | 0.84573  | 4.38801  | 6.46166 |                  |          |         |          |
| O                                   | 6.03294  | 4.38806  | 6.46154 |                  |          |         |          |
| O                                   | 0.84571  | 9.65292  | 6.46167 |                  |          |         |          |
| O                                   | 6.03296  | 9.65295  | 6.46158 |                  |          |         |          |
| Zr                                  | 2.6019   | 0.22651  | 6.7658  |                  |          |         |          |
| Zr                                  | 7.7892   | 0.22651  | 6.7658  |                  |          |         |          |
| Zr                                  | 2.6019   | 5.49141  | 6.7658  |                  |          |         |          |
| Zr                                  | 7.7892   | 5.49141  | 6.7658  |                  |          |         |          |
| Zr                                  | 4.83292  | 2.85897  | 7.20298 |                  |          |         |          |
| Zr                                  | 10.02022 | 2.85897  | 7.20298 |                  |          |         |          |
| Zr                                  | 4.83292  | 8.12387  | 7.20298 |                  |          |         |          |
| Zr                                  | 10.02022 | 8.12387  | 7.20298 |                  |          |         |          |
| O                                   | 1.41002  | 1.77661  | 7.46637 |                  |          |         |          |
| O                                   | 6.59732  | 1.77661  | 7.46637 |                  |          |         |          |
| O                                   | 1.41002  | 7.04151  | 7.46637 |                  |          |         |          |
| O                                   | 6.59732  | 7.04151  | 7.46637 |                  |          |         |          |

|    |         |          |          |
|----|---------|----------|----------|
| O  | 3.24022 | 3.98873  | 8.20343  |
| O  | 8.42752 | 3.98873  | 8.20343  |
| O  | 3.24022 | 9.25363  | 8.20343  |
| O  | 8.42752 | 9.25363  | 8.20343  |
| O  | 3.7451  | 1.27621  | 8.40356  |
| O  | 8.9324  | 1.27621  | 8.40356  |
| O  | 3.7451  | 6.54111  | 8.40356  |
| O  | 8.9324  | 6.54111  | 8.40356  |
| O  | 0.388   | 3.48832  | 9.14062  |
| O  | 5.5753  | 3.48832  | 9.14062  |
| O  | 0.388   | 8.75322  | 9.14062  |
| O  | 5.5753  | 8.75322  | 9.14062  |
| Zr | 2.1524  | 2.40597  | 9.40401  |
| Zr | 7.3397  | 2.40597  | 9.40401  |
| Zr | 2.1524  | 7.67087  | 9.40401  |
| Zr | 7.3397  | 7.67087  | 9.40401  |
| Zr | 4.38342 | 5.03843  | 9.8412   |
| Zr | 9.57072 | 5.03843  | 9.8412   |
| Zr | 4.38342 | 10.30333 | 9.8412   |
| Zr | 9.57072 | 10.30333 | 9.8412   |
| O  | 0.9335  | 0.90118  | 10.15415 |
| O  | 6.11984 | 0.87926  | 10.13091 |
| O  | 0.95571 | 6.13394  | 10.15096 |
| O  | 6.14026 | 6.16117  | 10.20711 |
| O  | 2.90131 | 3.90193  | 10.79453 |
| O  | 8.02372 | 3.90418  | 10.78489 |
| O  | 2.79514 | 9.17739  | 10.78818 |
| O  | 8.01504 | 9.1413   | 10.78817 |
| O  | 3.27428 | 1.36722  | 11.23329 |
| O  | 8.43655 | 1.32677  | 11.16421 |
| O  | 3.25049 | 6.63301  | 11.13217 |
| O  | 8.49223 | 6.59704  | 11.0793  |
| O  | 0.02083 | 4.32724  | 11.73014 |
| O  | 5.27244 | 4.33847  | 11.74636 |
| O  | 0.00862 | 9.58672  | 11.75775 |
| O  | 5.17107 | 9.54771  | 11.74746 |
| Zr | 1.61129 | 0.22617  | 12.13668 |
| Zr | 6.79968 | 0.18527  | 12.12939 |
| Zr | 1.63016 | 5.53924  | 12.12179 |
| Zr | 7.01673 | 5.42677  | 12.17056 |
| Zr | 4.11418 | 2.92206  | 12.49707 |
| Zr | 9.21981 | 2.85157  | 12.39001 |
| Zr | 3.82511 | 8.20901  | 12.44233 |
| Zr | 9.08397 | 8.13455  | 12.47538 |
| O  | 0.5088  | 1.7337   | 13.01444 |
| O  | 5.62195 | 1.64452  | 12.96046 |
| O  | 0.48364 | 6.98513  | 12.87963 |
| O  | 5.63945 | 7.03175  | 12.90425 |
| O  | 2.2787  | 3.72419  | 13.32362 |
| O  | 7.94108 | 3.97943  | 13.38766 |

|   |         |         |          |
|---|---------|---------|----------|
| O | 2.67821 | 9.53509 | 13.4038  |
| O | 7.93021 | 9.58901 | 13.36331 |
| O | 8.05428 | 6.6604  | 13.71282 |
| H | 8.53645 | 6.029   | 14.27748 |
| H | 6.06205 | 7.25863 | 13.76191 |
| O | 4.61127 | 4.46085 | 14.37798 |
| O | 2.9713  | 6.48508 | 13.88895 |
| S | 3.96543 | 5.47278 | 15.22444 |
| O | 4.84298 | 6.51256 | 15.69185 |
| O | 2.8669  | 5.04997 | 16.04366 |
| H | 2.23205 | 6.88139 | 14.40903 |
| H | 1.56204 | 3.01525 | 13.32476 |

Optimized XYZ position for S-M(011)

|              |         |        |        |                  |          |         |          |
|--------------|---------|--------|--------|------------------|----------|---------|----------|
| Lengths<br>Å | a       | b      | c      | Angles<br>degree | $\alpha$ | $\beta$ | $\gamma$ |
|              | 10.3746 | 7.5079 | 28.575 |                  | 90       | 90      | 83.1229  |

| Atom | x        | y       | z        |
|------|----------|---------|----------|
| O    | 0.83105  | 6.40113 | 4.9427   |
| O    | 6.01813  | 6.40143 | 4.94296  |
| O    | 2.48057  | 1.71543 | 5.1065   |
| O    | 7.66793  | 1.71519 | 5.106    |
| Zr   | 3.82682  | 3.2554  | 5.50681  |
| Zr   | 9.01368  | 3.25544 | 5.50661  |
| O    | 3.33336  | 5.28935 | 5.26574  |
| O    | 8.52073  | 5.2894  | 5.26576  |
| Zr   | 4.34806  | 7.24231 | 5.59451  |
| Zr   | 9.53483  | 7.24247 | 5.59429  |
| O    | 4.70762  | 1.426   | 6.16596  |
| O    | 9.89485  | 1.42625 | 6.16591  |
| O    | 0.56997  | 3.75585 | 6.02391  |
| O    | 5.75728  | 3.7558  | 6.0239   |
| Zr   | 1.62817  | 5.50066 | 6.59217  |
| Zr   | 6.81542  | 5.50084 | 6.59213  |
| O    | 2.73507  | 7.36984 | 7.08388  |
| O    | 7.92245  | 7.36991 | 7.08416  |
| Zr   | 1.24775  | 1.96318 | 7.08875  |
| Zr   | 6.43532  | 1.96312 | 7.089    |
| O    | 2.82329  | 3.51747 | 7.22918  |
| O    | 8.01061  | 3.51749 | 7.2291   |
| O    | 10.28121 | 6.40457 | 7.38395  |
| O    | 5.09368  | 6.40459 | 7.38397  |
| O    | 10.41537 | 2.6227  | 8.68456  |
| O    | 5.22798  | 2.62274 | 8.68468  |
| O    | 2.3183   | 5.439   | 8.86132  |
| O    | 7.50562  | 5.439   | 8.8614   |
| Zr   | 3.87598  | 6.94746 | 8.99096  |
| Zr   | 9.06322  | 6.94761 | 8.99077  |
| O    | 2.36847  | 1.58747 | 9.01973  |
| O    | 7.55579  | 1.58752 | 9.01989  |
| Zr   | 3.45704  | 3.56223 | 9.30706  |
| Zr   | 8.64436  | 3.56223 | 9.30706  |
| O    | 4.64892  | 5.15305 | 9.9095   |
| O    | 9.83623  | 5.15305 | 9.9095   |
| O    | 4.77196  | 0.09338 | 9.93861  |
| O    | 9.95928  | 0.09338 | 9.93861  |
| Zr   | 0.77652  | 1.6842  | 10.54105 |
| Zr   | 5.96383  | 1.6842  | 10.54105 |
| O    | 1.86434  | 3.65202 | 10.81344 |
| O    | 7.05166  | 3.65202 | 10.81344 |
| Zr   | 1.22601  | 5.7311  | 10.86172 |
| Zr   | 6.41333  | 5.7311  | 10.86172 |
| O    | 2.81872  | 7.23729 | 10.9548  |



|    |          |         |          |
|----|----------|---------|----------|
| O  | 8.00604  | 7.23729 | 10.9548  |
| O  | 4.19942  | 2.63515 | 11.12118 |
| O  | 9.38673  | 2.63515 | 11.12118 |
| O  | 10.40878 | 6.33007 | 12.45384 |
| O  | 5.22146  | 6.33007 | 12.45384 |
| O  | 1.41484  | 1.72794 | 12.62023 |
| O  | 6.60215  | 1.72794 | 12.62023 |
| Zr | 3.00754  | 3.23412 | 12.71332 |
| Zr | 8.19486  | 3.23412 | 12.71332 |
| O  | 2.36922  | 5.31321 | 12.76159 |
| O  | 7.55654  | 5.31321 | 12.76159 |
| Zr | 3.45704  | 7.28103 | 13.03398 |
| Zr | 8.64436  | 7.28103 | 13.03398 |
| O  | 3.74991  | 1.41798 | 13.63642 |
| O  | 8.93723  | 1.41798 | 13.63642 |
| O  | 4.77196  | 3.81218 | 13.66553 |
| O  | 9.95927  | 3.81218 | 13.66553 |
| Zr | 0.77651  | 5.403   | 14.26797 |
| Zr | 5.96383  | 5.403   | 14.26797 |
| O  | 1.86775  | 7.36792 | 14.55463 |
| O  | 7.03764  | 7.36347 | 14.53945 |
| Zr | 0.35004  | 2.00342 | 14.59033 |
| Zr | 5.52274  | 1.99868 | 14.55724 |
| O  | 1.90018  | 3.51532 | 14.71573 |
| O  | 7.10912  | 3.54195 | 14.70847 |
| O  | 4.21471  | 6.37077 | 14.89965 |
| O  | 9.3925   | 6.36722 | 14.8584  |
| O  | 4.23784  | 2.47457 | 16.13941 |
| O  | 9.4722   | 2.48787 | 16.22687 |
| O  | 1.39233  | 5.43706 | 16.39878 |
| O  | 6.57451  | 5.4326  | 16.35602 |
| Zr | 2.97459  | 6.9233  | 16.52177 |
| Zr | 8.16752  | 7.00599 | 16.45419 |
| O  | 1.47419  | 1.56304 | 16.49377 |
| O  | 6.67704  | 1.62318 | 16.40814 |
| Zr | 2.54703  | 3.50814 | 16.96682 |
| Zr | 7.71811  | 3.49324 | 16.80817 |
| O  | 3.77093  | 5.13663 | 17.46098 |
| O  | 8.89042  | 5.13119 | 17.3469  |
| O  | 3.70414  | 0.02914 | 17.64908 |
| O  | 8.94057  | 0.09117 | 17.50529 |
| Zr | 10.32136 | 1.64082 | 17.96536 |
| Zr | 4.9942   | 1.72844 | 17.90411 |
| O  | 0.83265  | 3.62415 | 18.28312 |
| O  | 6.13602  | 3.59375 | 18.22995 |
| Zr | 10.65743 | 5.68881 | 18.23447 |
| Zr | 5.65517  | 5.71521 | 18.16507 |
| O  | 1.74698  | 7.2253  | 18.42902 |
| O  | 6.98626  | 7.31856 | 18.23951 |
| O  | 3.3816   | 2.62635 | 18.61093 |

|   |         |         |          |
|---|---------|---------|----------|
| O | 8.5721  | 2.55716 | 18.76959 |
| H | 7.9645  | 1.92423 | 19.19987 |
| H | 7.24395 | 4.37118 | 20.14237 |
| S | 8.3402  | 6.1413  | 20.95061 |
| O | 9.55626 | 5.87399 | 20.10126 |
| O | 7.07336 | 5.33933 | 20.08677 |
| O | 7.93645 | 7.51868 | 20.91998 |
| O | 8.39805 | 5.42557 | 22.18976 |

Optimized XYZ position for S-T(111)-1

| Lengths<br>Å | a       | b        | c       | Angles<br>degree | $\alpha$ | $\beta$ | $\gamma$ |
|--------------|---------|----------|---------|------------------|----------|---------|----------|
|              | 10.2592 | 6.3733   | 27.6706 |                  | 90       | 90      | 66.2762  |
|              | Atom    | x        | y       | z                |          |         |          |
|              | O       | 3.51158  | 2.19731 | 6.33699          |          |         |          |
|              | O       | 8.64118  | 2.19731 | 6.33699          |          |         |          |
|              | Zr      | 4.66312  | 3.7109  | 7.1297           |          |         |          |
|              | Zr      | 9.79272  | 3.7109  | 7.1297           |          |         |          |
|              | O       | 3.71395  | 5.54856 | 7.30903          |          |         |          |
|              | O       | 8.84355  | 5.54856 | 7.30903          |          |         |          |
|              | O       | 6.18734  | 5.20706 | 7.56457          |          |         |          |
|              | O       | 11.31694 | 5.20706 | 7.56457          |          |         |          |
|              | Zr      | 2.58219  | 1.23317 | 7.88118          |          |         |          |
|              | Zr      | 7.71179  | 1.23317 | 7.88118          |          |         |          |
|              | O       | 3.50199  | 3.24628 | 8.68191          |          |         |          |
|              | O       | 8.63159  | 3.24628 | 8.68191          |          |         |          |
|              | O       | 6.01755  | 2.61725 | 8.3085           |          |         |          |
|              | O       | 11.14715 | 2.61725 | 8.3085           |          |         |          |
|              | Zr      | 2.46454  | 5.03609 | 9.07933          |          |         |          |
|              | Zr      | 7.59414  | 5.03609 | 9.07933          |          |         |          |
|              | O       | 3.80856  | 0.94265 | 9.6003           |          |         |          |
|              | O       | 8.93816  | 0.94265 | 9.6003           |          |         |          |
|              | O       | 1.25681  | 0.57227 | 9.84712          |          |         |          |
|              | O       | 6.38641  | 0.57227 | 9.84712          |          |         |          |
|              | Zr      | 5.13075  | 2.45192 | 10.29317         |          |         |          |
|              | Zr      | 10.26035 | 2.45192 | 10.29317         |          |         |          |
|              | O       | 6.41286  | 4.41661 | 10.75941         |          |         |          |
|              | O       | 11.54246 | 4.41661 | 10.75941         |          |         |          |
|              | O       | 3.84805  | 3.96931 | 10.97838         |          |         |          |
|              | O       | 8.97765  | 3.96931 | 10.97838         |          |         |          |
|              | Zr      | 2.566    | 0.09922 | 11.44465         |          |         |          |
|              | Zr      | 7.6956   | 0.09922 | 11.44465         |          |         |          |
|              | O       | 1.28332  | 2.06329 | 11.91117         |          |         |          |
|              | O       | 6.41292  | 2.06329 | 11.91117         |          |         |          |
|              | O       | 3.84808  | 1.61529 | 12.13037         |          |         |          |
|              | O       | 8.97768  | 1.61529 | 12.13037         |          |         |          |
|              | Zr      | 2.56536  | 3.57939 | 12.59689         |          |         |          |
|              | Zr      | 7.69496  | 3.57939 | 12.59689         |          |         |          |
|              | O       | 3.84748  | 5.54408 | 13.06313         |          |         |          |
|              | O       | 8.97708  | 5.54408 | 13.06313         |          |         |          |
|              | O       | 6.41226  | 5.09675 | 13.28211         |          |         |          |
|              | O       | 11.54186 | 5.09675 | 13.28211         |          |         |          |
|              | Zr      | 5.1302   | 1.22665 | 13.74837         |          |         |          |
|              | Zr      | 10.2598  | 1.22665 | 13.74837         |          |         |          |
|              | O       | 3.85578  | 3.13191 | 14.20806         |          |         |          |
|              | O       | 8.98641  | 3.12502 | 14.20247         |          |         |          |
|              | O       | 1.30089  | 2.75206 | 14.37398         |          |         |          |
|              | O       | 6.43303  | 2.76077 | 14.39452         |          |         |          |
|              | Zr      | 5.17078  | 4.58484 | 14.9749          |          |         |          |

|    |          |         |          |
|----|----------|---------|----------|
| Zr | 10.3071  | 4.58219 | 14.93739 |
| O  | 4.20626  | 1.02924 | 15.68442 |
| O  | 9.30736  | 1.01033 | 15.66616 |
| O  | 1.60555  | 0.48291 | 15.49008 |
| O  | 6.68933  | 0.47014 | 15.46591 |
| Zr | 2.58829  | 2.4708  | 15.99798 |
| Zr | 7.73945  | 2.48848 | 15.99817 |
| O  | 3.94247  | 3.95414 | 16.70576 |
| O  | 9.09269  | 3.95599 | 16.68385 |
| O  | 6.61939  | 4.29603 | 16.43793 |
| O  | 11.73079 | 4.27599 | 16.38272 |
| Zr | 2.83931  | 5.70696 | 17.04524 |
| Zr | 8.02567  | 5.72794 | 17.0277  |
| O  | 1.52609  | 1.66041 | 17.67378 |
| O  | 6.8923   | 1.54275 | 17.7105  |
| H  | 11.67579 | 2.14724 | 18.50833 |
| O  | 12.42336 | 5.71334 | 18.94002 |
| H  | 12.75018 | 6.04794 | 19.78917 |
| O  | 18.75915 | 5.0173  | 19.27663 |
| S  | 17.79918 | 6.24092 | 20.01126 |
| O  | 18.75089 | 7.23984 | 20.44314 |
| O  | 17.0946  | 6.58582 | 18.72385 |
| O  | 16.96018 | 5.60833 | 20.97927 |
| H  | 19.67944 | 5.06467 | 19.61345 |
| H  | 19.62712 | 7.73208 | 18.62089 |

Optimized XYZ position for S-T(111)-2

| Lengths<br>Å | a        | b       | c        | Angles<br>degree | $\alpha$ | $\beta$ | $\gamma$ |
|--------------|----------|---------|----------|------------------|----------|---------|----------|
|              | 10.2592  | 6.3733  | 27.6706  |                  | 90       | 90      | 66.2762  |
| Atom         | x        | y       | z        |                  |          |         |          |
| O            | 3.51158  | 2.19731 | 6.33699  |                  |          |         |          |
| O            | 8.64118  | 2.19731 | 6.33699  |                  |          |         |          |
| Zr           | 4.66312  | 3.7109  | 7.1297   |                  |          |         |          |
| Zr           | 9.79272  | 3.7109  | 7.1297   |                  |          |         |          |
| O            | 3.71395  | 5.54856 | 7.30903  |                  |          |         |          |
| O            | 8.84355  | 5.54856 | 7.30903  |                  |          |         |          |
| O            | 6.18734  | 5.20706 | 7.56457  |                  |          |         |          |
| O            | 11.31694 | 5.20706 | 7.56457  |                  |          |         |          |
| Zr           | 2.58219  | 1.23317 | 7.88118  |                  |          |         |          |
| Zr           | 7.71179  | 1.23317 | 7.88118  |                  |          |         |          |
| O            | 3.50199  | 3.24628 | 8.68191  |                  |          |         |          |
| O            | 8.63159  | 3.24628 | 8.68191  |                  |          |         |          |
| O            | 6.01755  | 2.61725 | 8.3085   |                  |          |         |          |
| O            | 11.14715 | 2.61725 | 8.3085   |                  |          |         |          |
| Zr           | 2.46454  | 5.03609 | 9.07933  |                  |          |         |          |
| Zr           | 7.59414  | 5.03609 | 9.07933  |                  |          |         |          |
| O            | 3.80856  | 0.94265 | 9.6003   |                  |          |         |          |
| O            | 8.93816  | 0.94265 | 9.6003   |                  |          |         |          |
| O            | 1.25681  | 0.57227 | 9.84712  |                  |          |         |          |
| O            | 6.38641  | 0.57227 | 9.84712  |                  |          |         |          |
| Zr           | 5.13075  | 2.45192 | 10.29317 |                  |          |         |          |
| Zr           | 10.26035 | 2.45192 | 10.29317 |                  |          |         |          |
| O            | 6.41286  | 4.41661 | 10.75941 |                  |          |         |          |
| O            | 11.54246 | 4.41661 | 10.75941 |                  |          |         |          |
| O            | 3.84805  | 3.96931 | 10.97838 |                  |          |         |          |
| O            | 8.97765  | 3.96931 | 10.97838 |                  |          |         |          |
| Zr           | 2.566    | 0.09922 | 11.44465 |                  |          |         |          |
| Zr           | 7.6956   | 0.09922 | 11.44465 |                  |          |         |          |
| O            | 1.28332  | 2.06329 | 11.91117 |                  |          |         |          |
| O            | 6.41292  | 2.06329 | 11.91117 |                  |          |         |          |
| O            | 3.84808  | 1.61529 | 12.13037 |                  |          |         |          |
| O            | 8.97768  | 1.61529 | 12.13037 |                  |          |         |          |
| Zr           | 2.56536  | 3.57939 | 12.59689 |                  |          |         |          |
| Zr           | 7.69496  | 3.57939 | 12.59689 |                  |          |         |          |
| O            | 3.84748  | 5.54408 | 13.06313 |                  |          |         |          |
| O            | 8.97708  | 5.54408 | 13.06313 |                  |          |         |          |
| O            | 6.41226  | 5.09675 | 13.28211 |                  |          |         |          |
| O            | 11.54186 | 5.09675 | 13.28211 |                  |          |         |          |
| Zr           | 5.1302   | 1.22665 | 13.74837 |                  |          |         |          |
| Zr           | 10.2598  | 1.22665 | 13.74837 |                  |          |         |          |
| O            | 3.85647  | 3.12388 | 14.21215 |                  |          |         |          |
| O            | 9.01055  | 3.13096 | 14.20255 |                  |          |         |          |
| O            | 1.323    | 2.73453 | 14.4183  |                  |          |         |          |
| O            | 6.45346  | 2.74076 | 14.42192 |                  |          |         |          |
| Zr           | 5.26875  | 4.49254 | 14.96545 |                  |          |         |          |

|    |          |         |          |
|----|----------|---------|----------|
| Zr | 10.2998  | 4.5638  | 14.95206 |
| O  | 4.22092  | 1.04241 | 15.66386 |
| O  | 9.35518  | 1.01537 | 15.68269 |
| O  | 1.6878   | 0.42169 | 15.52575 |
| O  | 6.67408  | 0.44267 | 15.37289 |
| Zr | 2.60726  | 2.46267 | 16.02179 |
| Zr | 7.70408  | 2.4408  | 16.14696 |
| O  | 3.98236  | 3.89292 | 16.70372 |
| O  | 9.11859  | 4.0045  | 16.77827 |
| O  | 6.65096  | 4.28834 | 16.45078 |
| O  | 11.79549 | 4.34313 | 16.4319  |
| Zr | 2.97919  | 5.72412 | 16.97003 |
| Zr | 8.0862   | 5.83711 | 17.0216  |
| O  | 1.15433  | 1.88519 | 17.55459 |
| O  | 6.8418   | 1.4715  | 17.68043 |
| O  | 4.27326  | 5.33692 | 18.87752 |
| S  | 5.63574  | 6.15396 | 19.61513 |
| O  | 5.02551  | 7.26471 | 20.27401 |
| O  | 6.25513  | 5.08298 | 20.34546 |
| O  | 6.44572  | 6.56953 | 18.41209 |
| H  | 3.18699  | 8.48239 | 17.85281 |
| H  | 4.57183  | 4.40463 | 18.75497 |

Optimized XYZ position for 2S-T(111)

| Lengths<br>Å | a        | b       | c        | Angles<br>degree | $\alpha$ | $\beta$ | $\gamma$ |
|--------------|----------|---------|----------|------------------|----------|---------|----------|
|              | 10.2592  | 6.3733  | 27.6706  |                  | 90       | 90      | 66.2762  |
| Atom         | x        | y       | z        |                  |          |         |          |
| O            | 3.51158  | 2.19731 | 6.33699  |                  |          |         |          |
| O            | 8.64118  | 2.19731 | 6.33699  |                  |          |         |          |
| Zr           | 4.66312  | 3.7109  | 7.1297   |                  |          |         |          |
| Zr           | 9.79272  | 3.7109  | 7.1297   |                  |          |         |          |
| O            | 3.71395  | 5.54856 | 7.30903  |                  |          |         |          |
| O            | 8.84355  | 5.54856 | 7.30903  |                  |          |         |          |
| O            | 6.18734  | 5.20706 | 7.56457  |                  |          |         |          |
| O            | 11.31694 | 5.20706 | 7.56457  |                  |          |         |          |
| Zr           | 2.58219  | 1.23317 | 7.88118  |                  |          |         |          |
| Zr           | 7.71179  | 1.23317 | 7.88118  |                  |          |         |          |
| O            | 3.50199  | 3.24628 | 8.68191  |                  |          |         |          |
| O            | 8.63159  | 3.24628 | 8.68191  |                  |          |         |          |
| O            | 6.01755  | 2.61725 | 8.3085   |                  |          |         |          |
| O            | 11.14715 | 2.61725 | 8.3085   |                  |          |         |          |
| Zr           | 2.46454  | 5.03609 | 9.07933  |                  |          |         |          |
| Zr           | 7.59414  | 5.03609 | 9.07933  |                  |          |         |          |
| O            | 3.80856  | 0.94265 | 9.6003   |                  |          |         |          |
| O            | 8.93816  | 0.94265 | 9.6003   |                  |          |         |          |
| O            | 1.25681  | 0.57227 | 9.84712  |                  |          |         |          |
| O            | 6.38641  | 0.57227 | 9.84712  |                  |          |         |          |
| Zr           | 5.13075  | 2.45192 | 10.29317 |                  |          |         |          |
| Zr           | 10.26035 | 2.45192 | 10.29317 |                  |          |         |          |
| O            | 6.41286  | 4.41661 | 10.75941 |                  |          |         |          |
| O            | 11.54246 | 4.41661 | 10.75941 |                  |          |         |          |
| O            | 3.84805  | 3.96931 | 10.97838 |                  |          |         |          |
| O            | 8.97765  | 3.96931 | 10.97838 |                  |          |         |          |
| Zr           | 2.566    | 0.09922 | 11.44465 |                  |          |         |          |
| Zr           | 7.6956   | 0.09922 | 11.44465 |                  |          |         |          |
| O            | 1.28332  | 2.06329 | 11.91117 |                  |          |         |          |
| O            | 6.41292  | 2.06329 | 11.91117 |                  |          |         |          |
| O            | 3.84808  | 1.61529 | 12.13037 |                  |          |         |          |
| O            | 8.97768  | 1.61529 | 12.13037 |                  |          |         |          |
| Zr           | 2.56536  | 3.57939 | 12.59689 |                  |          |         |          |
| Zr           | 7.69496  | 3.57939 | 12.59689 |                  |          |         |          |
| O            | 3.84748  | 5.54408 | 13.06313 |                  |          |         |          |
| O            | 8.97708  | 5.54408 | 13.06313 |                  |          |         |          |
| O            | 6.41226  | 5.09675 | 13.28211 |                  |          |         |          |
| O            | 11.54186 | 5.09675 | 13.28211 |                  |          |         |          |
| Zr           | 5.1302   | 1.22665 | 13.74837 |                  |          |         |          |
| Zr           | 10.2598  | 1.22665 | 13.74837 |                  |          |         |          |
| O            | 3.89294  | 3.11551 | 14.19106 |                  |          |         |          |
| O            | 9.02053  | 3.11206 | 14.18759 |                  |          |         |          |
| O            | 1.35062  | 2.71911 | 14.39467 |                  |          |         |          |
| O            | 6.47785  | 2.71824 | 14.3959  |                  |          |         |          |
| Zr           | 5.23316  | 4.54021 | 14.96146 |                  |          |         |          |

|    |          |          |          |
|----|----------|----------|----------|
| Zr | 10.36429 | 4.52963  | 14.96169 |
| O  | 4.25798  | 0.99895  | 15.68751 |
| O  | 9.38996  | 1.00895  | 15.69475 |
| O  | 1.65302  | 0.42114  | 15.51507 |
| O  | 6.80414  | 0.41941  | 15.53762 |
| Zr | 2.65599  | 2.42594  | 16.00606 |
| Zr | 7.77604  | 2.42501  | 16.00428 |
| O  | 4.03499  | 3.88513  | 16.68342 |
| O  | 9.16103  | 3.87731  | 16.67249 |
| O  | 6.69813  | 4.27943  | 16.40675 |
| O  | 11.82491 | 4.26839  | 16.40987 |
| Zr | 2.97778  | 5.64317  | 17.05995 |
| Zr | 8.11444  | 5.63513  | 17.06887 |
| O  | 1.60838  | 1.64046  | 17.68615 |
| O  | 6.61548  | 1.71327  | 17.652   |
| H  | 8.38213  | 11.66579 | 19.14908 |
| H  | 3.17052  | 11.75926 | 19.04011 |
| O  | 9.30706  | 11.9137  | 18.91719 |
| O  | 4.07283  | 12.1067  | 18.81972 |
| O  | 11.47794 | 10.99789 | 19.10273 |
| O  | 6.15887  | 11.00309 | 19.13949 |
| O  | 9.82506  | 10.30655 | 20.8104  |
| O  | 4.51339  | 10.8711  | 20.98969 |
| O  | 10.80906 | 12.60186 | 20.83992 |
| O  | 5.72056  | 12.99992 | 20.48698 |
| S  | 10.44084 | 11.40993 | 20.1392  |
| S  | 5.19542  | 11.72695 | 20.07446 |
| H  | 8.97371  | 8.04144  | 18.46818 |
| H  | 14.27796 | 7.85903  | 18.57485 |



## REFERENCE

1. T. Jin, T. Yamaguchi and K. Tanabe, *J. Phys. Chem.*, 1986, **90**, 4794-4796.
2. D. A. Ward and E. I. Ko, *J. Catal.*, 1994, **150**, 18-33.
3. K. Arata and M. Hino, *Mater. Chem. Phys.*, 1990, **26**, 213-237.
4. A. Clearfield, G. P. D. Serrette and A. H. Khazisyed, *Catal. Today*, 1994, **20**, 295-312.
5. J. H. Lunsford, H. Sang, S. M. Campbell, C. H. Liang and R. G. Anthony, *Catal. Lett.*, 1994, **27**, 305-314.
6. M. Bensitel, O. Saur, J. C. Lavalley and B. A. Morrow, *Mater. Chem. Phys.*, 1988, **19**, 147-156.
7. T. Riemer, D. Spielbauer, M. Hunger, G. A. H. Mekheimer and H. Knozinger, *J. Chem. Soc.-Chem. Commun.*, 1994, **10**, 1181-1182.
8. C. Morterra, G. Cerrato, F. Pinna and M. Signoretto, *J. Phys. Chem.*, 1994, **98**, 12373-12381.
9. L. M. Kustov, V. B. Kazansky, F. Figueras and D. Tichit, *J. Catal.*, 1994, **150**, 143-149.
10. R. Srinivasan, R. A. Keogh, D. R. Milburn and B. H. Davis, *J. Catal.*, 1995, **153**, 123-130.
